# Supplementary material
Source: PubMed Central journal article supplement (PMC3593829)
Supplement: 1215404110_pnas.201215404SI.pdf [file 1215404110_pnas.201215404SI.pdf]

# Supporting Information

Wright and Wimberly 10.1073/pnas.1215404110

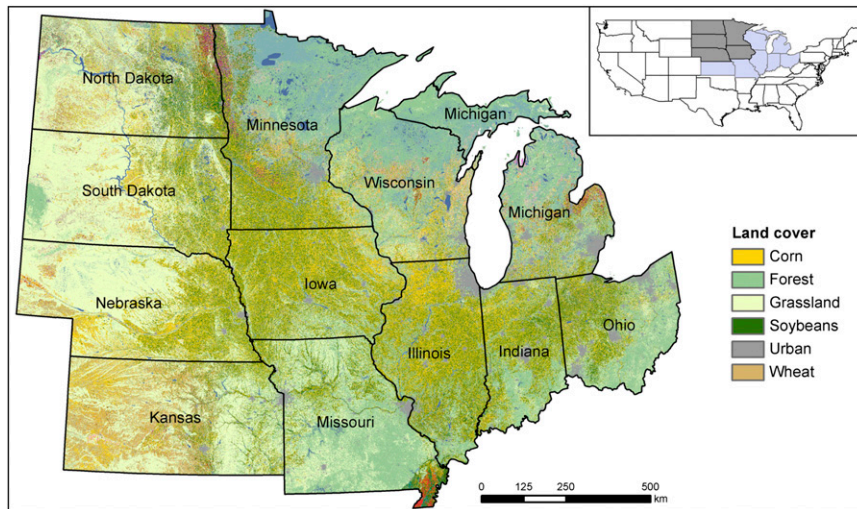

**Fig. S1.** The US Corn Belt extending from central Ohio in the east to the Dakotas and Nebraska in the west. Because corn is typically grown in rotation with soybeans, the Corn Belt might be better termed the Corn/Soy Belt. Corn cover is shown in yellow, soybean cover is green. Additional major land cover classes are included in the key. Image based on data from the 2011 National Agricultural Statistics Service Cropland Data Layer (CDL, ref. 1). (Inset) The five states comprising the Western Corn Belt are shaded dark gray.

1. US Department of Agriculture, National Agricultural Statistics Service (2012) *Cropland Data Layer Metadata*. Available at [www.nass.usda.gov/research/Cropland/metadata/meta.htm](http://www.nass.usda.gov/research/Cropland/metadata/meta.htm). Accessed August 9, 2012.

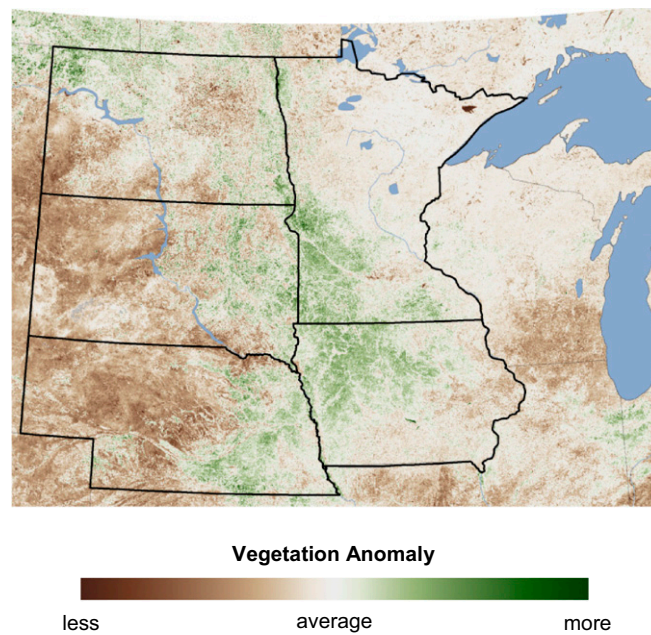

**Fig. S2.** Vegetation anomalies for the period of June 25 to July 10, 2012. Image constructed from an analysis by the NASA Earth Observatory, downloaded as a geotiff from ref. 1. Anomalies are based on the Normalized Difference Vegetation Index and are relative to average conditions over the period 2002 to 2012 (1).

1. NASA Earth Observatory (2012) Drought Grips the United States. Available at <http://earthobservatory.nasa.gov/IOTD/view.php?id=78553>. Accessed July 18, 2012.
